# Supplementary material for: Dual-Layer Approach toward Self-Healing and Self-Cleaning Polyurethane Thermosets
Source: MDPI journal article supplement (doi:10.3390/polym11111849), 2019-11-09
Supplement: s1 [file s1]

## **SUPPORTING INFORMATION**

### **Dual-Layer Approach toward Self-Healing and Self-Cleaning Polyurethane Thermosets**

Muhammad Naveed, Muhammad Rabnawaz\*, Ajmir Khan, Mohammad O. Tuhin

School of Packaging, Michigan State University, 448 Wilson Road, East

Lansing, Michigan 48824-1223, United States of America

Corresponding author: Muhammad Rabnawaz

Tel.: +1 517-432-4870;

E-mail: [rabnawaz@msu.edu](mailto:rabnawaz@msu.edu); Postal address: School of Packaging, Michigan State University,

448 Wilson Road, East Lansing, Michigan 48824-1223, United States of America.

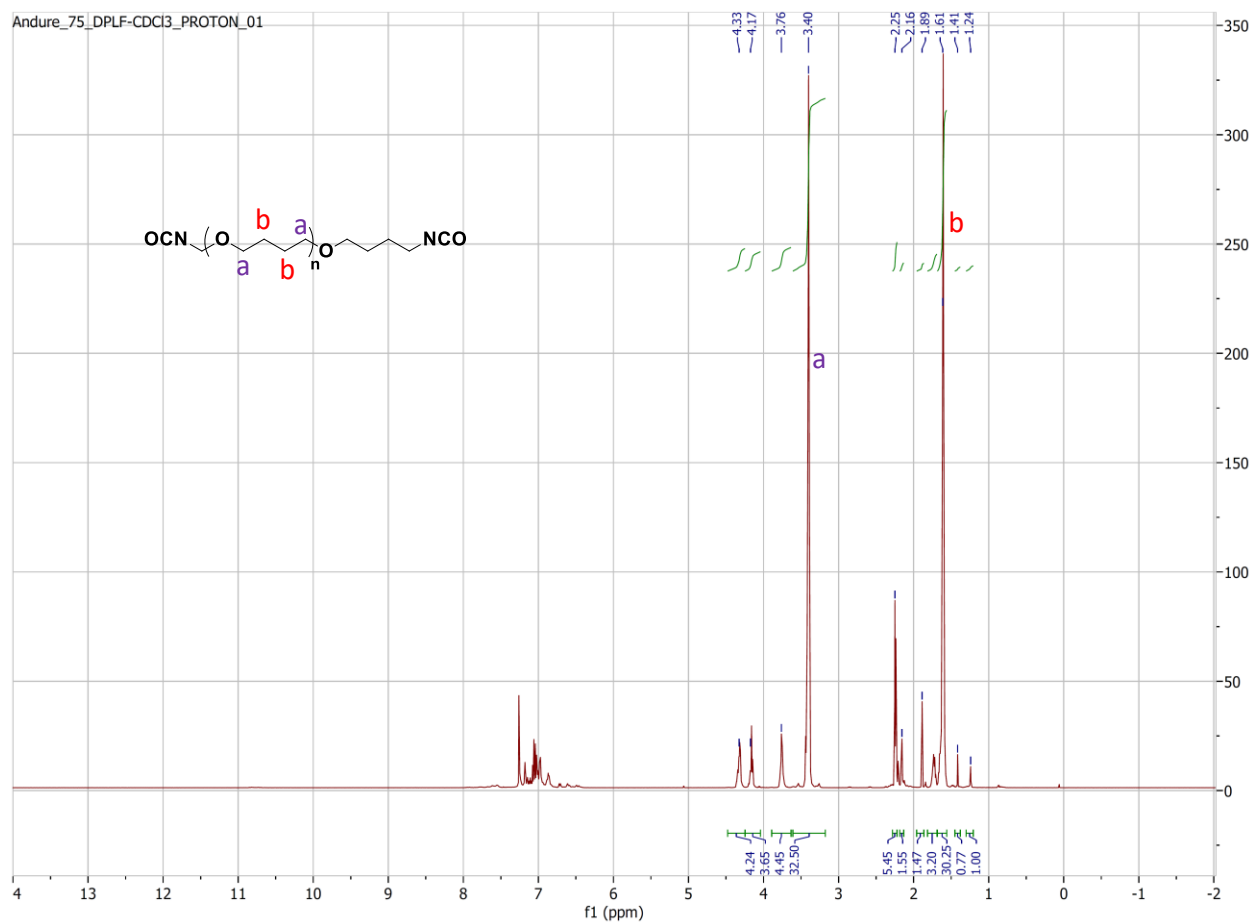

**Figure S1:**  $^1\text{H}$  NMR (500 MHz,  $\text{CDCl}_3$ ) of the PU pre-polymer; Strong peaks at 3.40 ppm (a) and 1.61 ppm (b) indicates polytetrahydrofuran (PolyTHF) backbone of the pre-polymer.

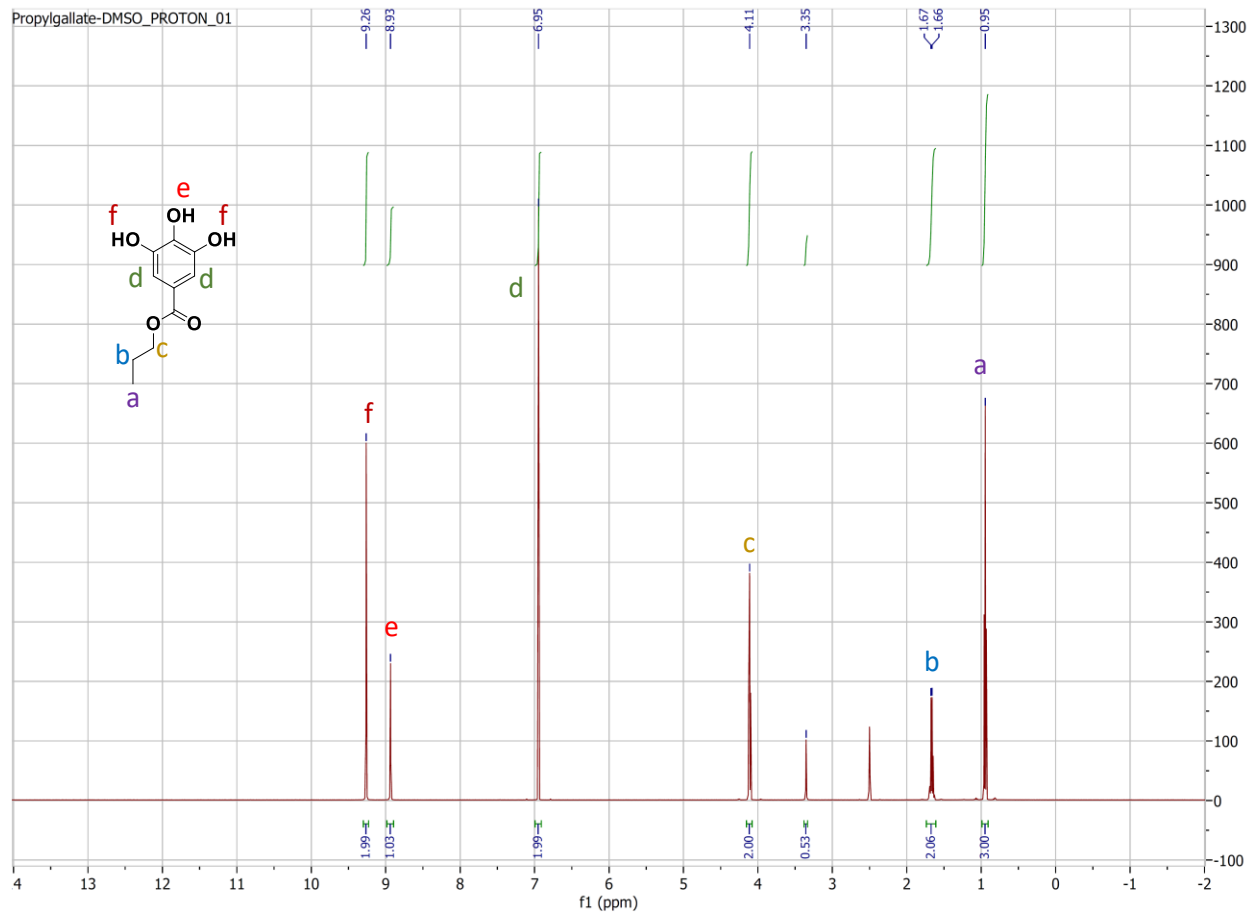

**Figure S2:** <sup>1</sup>H NMR (500 MHz, DMSO-*d*<sub>6</sub>) of the propylgallate (PG)

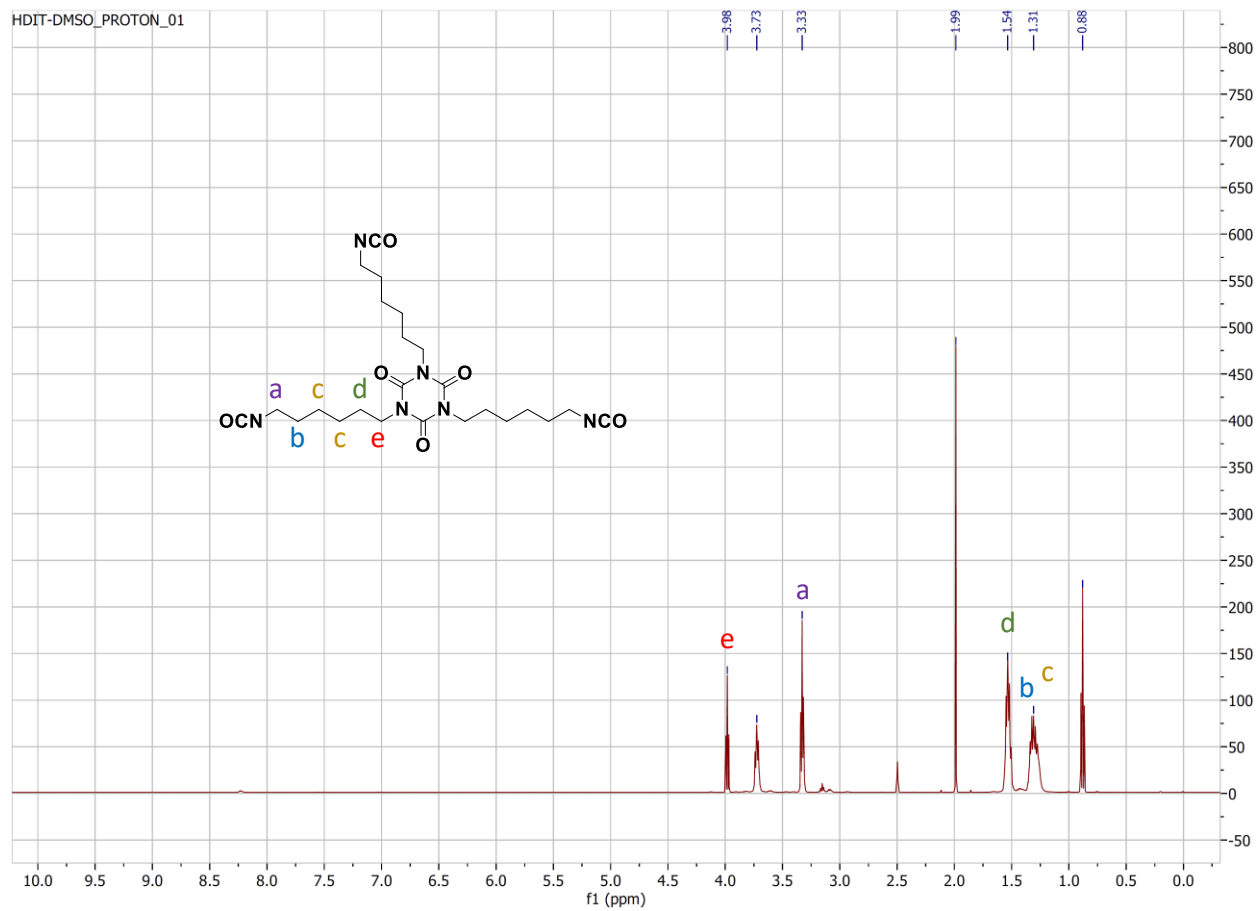

**Figure S3:** <sup>1</sup>H NMR (500 MHz, DMSO-*d*<sub>6</sub>) of the hexamethylene diisocyanate trimer (HDIT)

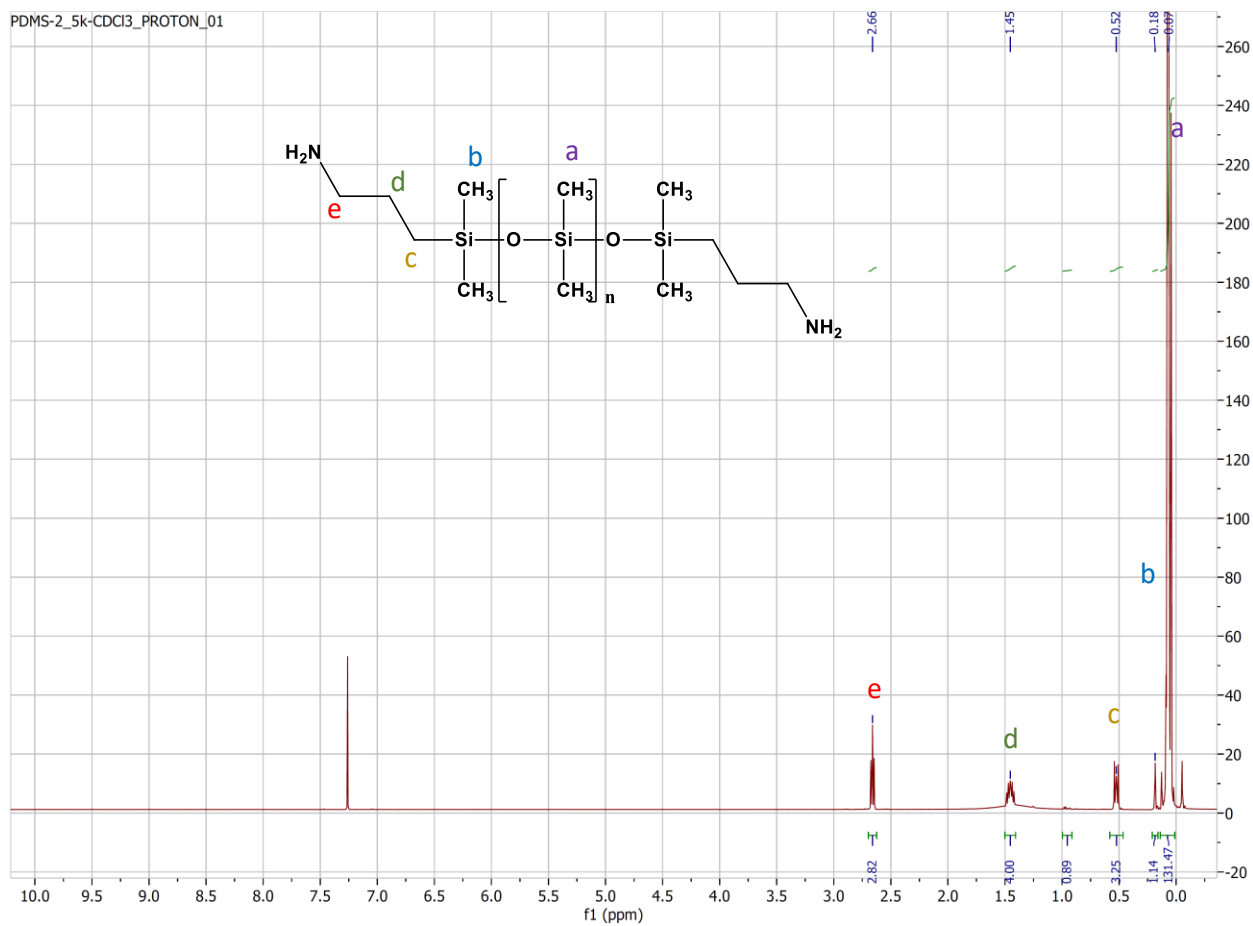

**Figure S4:**  $^1\text{H}$  NMR (500 MHz,  $\text{CDCl}_3$ ) of the  $\text{NH}_2$ -PDMS $\text{NH}_2$  ( $M_n = 2,500$  g/mol)

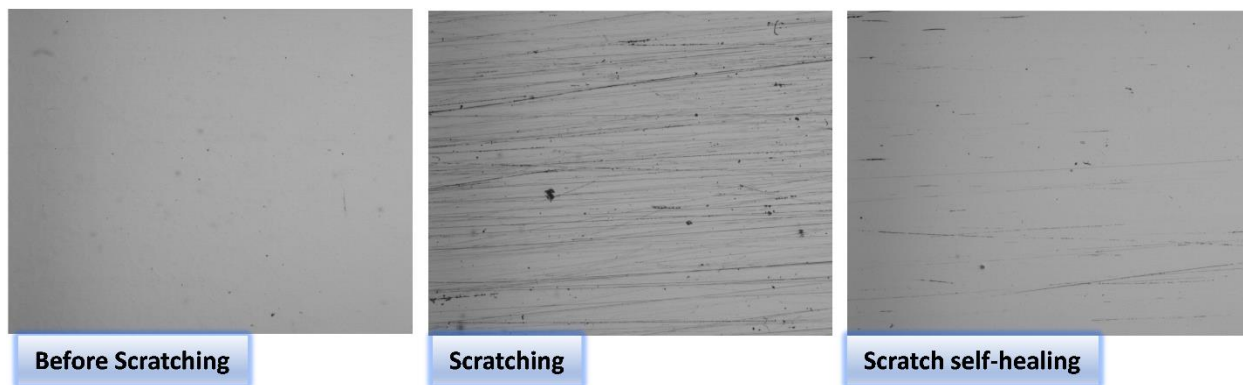

**Figure S5:** Optical microscopic images, scratch autonomous self-healing in two days at ambient temperature.

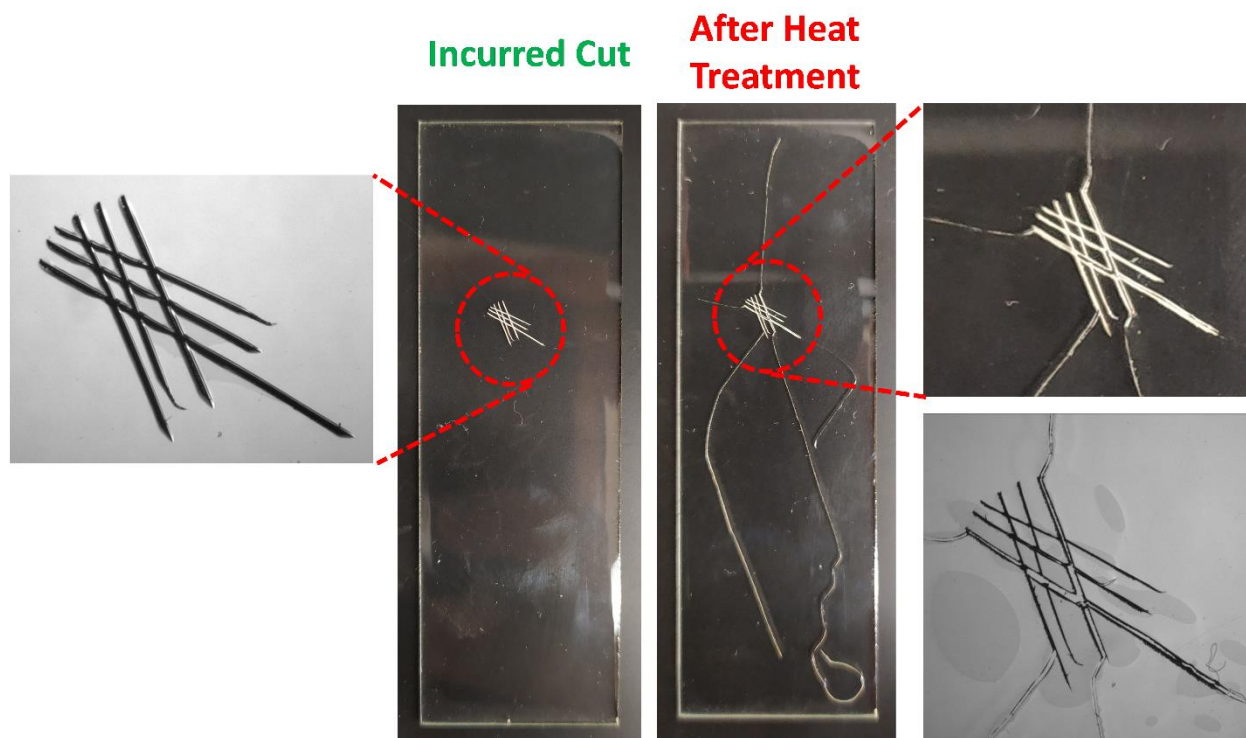

**Figure S6:** Digital and optical microscopy images showing the lack of self-healing ability of conventional polyurethane coating derived from hexamethylene diisocyanate trimer and acrylic polyol before and after thermal treatment at 130 °C for 40 min.

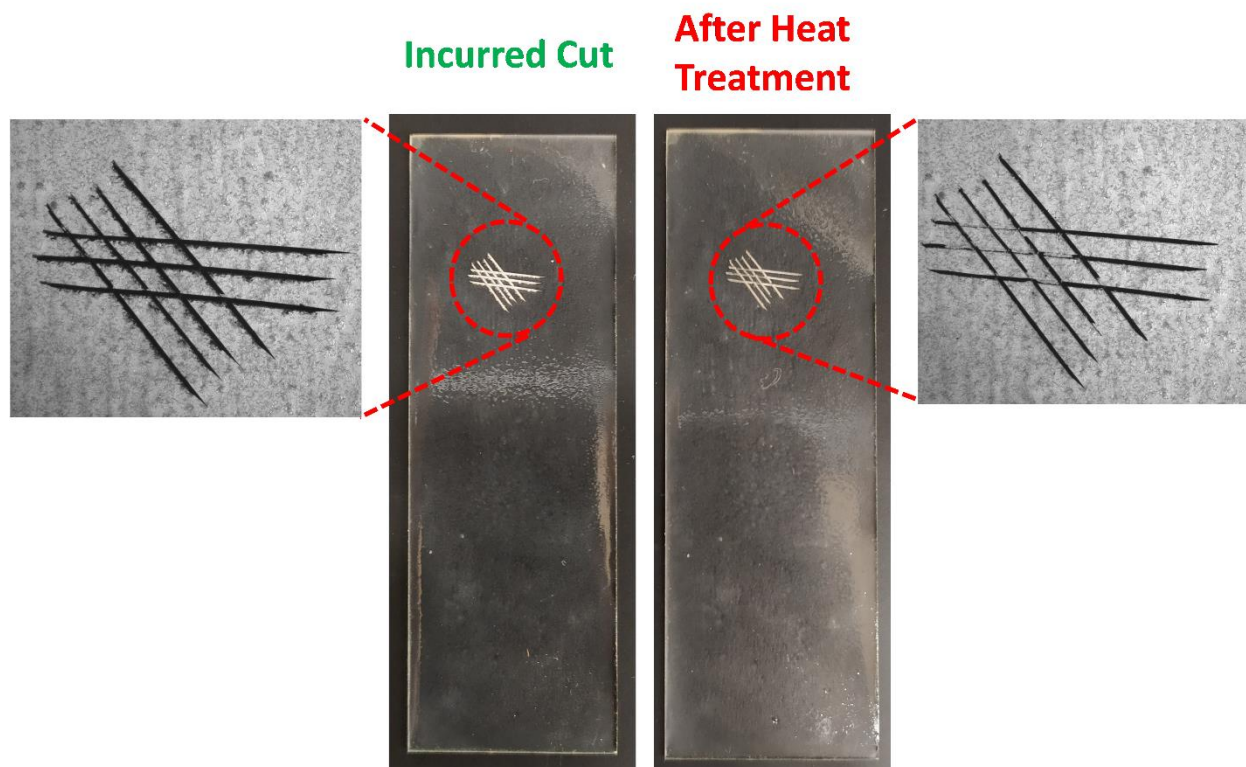

**Figure S7:** Digital and optical microscopy images showing the lack of self-healing ability after thermal treatment at 130 °C for 40 min of polyurethane coatings prepared by polyTHF PU prepolymer and glycerol.
